# Supplementary material
Source: PubMed Central journal article supplement (PMC6865312)
Supplement: jamainternmed-180-117-s003.pdf [file jamainternmed-180-117-s003.pdf]

## Data Sharing Statement

### Data

**Data available:** Yes

**Data types:** Deidentified participant data, Data dictionary

**How to access data:** [rmacgowan@cdc.gov](mailto:rmacgowan@cdc.gov)

**When available:** With publication

### Supporting Documents

**Document types:** Informed consent form

**How to access documents:** [rmacgowan@cdc.gov](mailto:rmacgowan@cdc.gov)

**When available:** With publication

### Additional Information

**Who can access the data:** Researchers who have a proposal approved by CDC investigators.

**Types of analyses:** All analyses will be considered.

**Mechanisms of data availability:** Data will be provided after a CDC approved proposal and investigator support will be required.
